# Supplementary material for: Modulation of anti-tumor immunity by the brain’s reward system
Source: PubMed Central journal article supplement (PMC6045610; doi:10.1038/s41467-018-05283-5), 2018-07-13
Supplement: 41467_2018_5283_MOESM2_ESM.pdf [file 41467_2018_5283_MOESM2_ESM.pdf]

## **Reviewers' comments:**

### **Reviewer #1 (Remarks to the Author):**

This work by Ben-Shaanan and Schiller et al. follows up on their recently published Nature Medicine paper in which they reported that VTA activation can alter peripheral immune responses and contribute to improved pathogen control. For this study, they wanted to address whether VTA activation similarly promotes enhanced anti-tumor immune responses. They report here that VTA activation does indeed lead to improved tumor control and that this is mediated at least in part through modulation of CD11b+Gr-1+ cell activity. They also employ pharmacological approaches to support a role for the sympathetic nervous system (SNS) and noradrenergic input in VTA activation associated boosting of anti-tumor immune responses. This area of research is compelling and timely and the Rolls lab is uniquely positioned to execute these studies. However, there are several key issues, which I believe need to be addressed in order to solidify their central findings and conclusions.

#### Major comments:

- (1) It would be helpful in the evaluation of their findings to know whether VTA activation influences the efficiency of cellular adoptive transfer. For instance, does their treatment conditions promote a more robust peritoneal immune response that results in an initial rejection of tumor cells and/or MDSCs immediately following injection?
- (2) Control images and quantification are needed to validate equal neuronal infection between control and VTA virus injections in Figure 1B-C and Supplementary Figures 1-2.
- (3) Control groups should be more extensively described in all of the figure legends. For instance, are the control groups AAV8-hSyn-DIO-mCherry infection plus CNO treatment? Or just one or the other? This should be stated in each of the figure legends.
- (4) Confirmation is needed to validate that DREADD-induced activation of cells in the VTA is specifically responsible for orchestrating the observed changes in anti-tumor immune responses. It could be that TH+ cells in other regions of the brain are also infected. To demonstrate that the reported effects are due to DREADD-mediated activation only in the VTA, the authors should additionally evaluate mCherry staining in other brain regions that have also been proposed to wire the brain's reward system, including the nucleus accumbens, lateral hypothalamus frontal cortex, etc.
- (5) Utilization of 6OHDA to ablate the SNS could potentially have off-target effects that may influence the interpretation of their data. Therefore, a secondary approach to ablate SNS function would help to strengthen their conclusion that the SNS is mechanistically involved in mediating the effects of VTA activation on tumor eradication. Furthermore, the authors should also confirm that 6OHDA does not cross the BBB in their model. They cite that 6OHDA does not normally cross the BBB under homeostatic conditions. However, they are now introducing a number of variables into their system including tumor-induced inflammation and CNO treatment, both of which could potentially influence the integrity of the BBB separately or in tandem.
- (6) The authors rely on Gr-1+CD11b+ staining to identify MDSCs in their studies. The possibility exists that some of their differences that they ascribe to MDSCs in VTA-activated vs. control mice are actually due to the effects of VTA stimulation on neutrophil responses.

Gr-1 stains both Ly6C and Ly6G, thus their gating strategy could include both neutrophils (CD11b+Ly6G+) and MDSCs (CD11b+Ly6C/G+).

(7) The induction of p-CREB MFI levels following beta-agonist treatment is not all that striking. Representative histogram plots should be provided to accompany the MFI data plotted in Figure 3C to properly evaluate these differences.

(8) The technical aspects of their MDSC:T cell suppression experiments are not adequately described in the methods, figure legend, or actual text. It is unclear if they are measuring percentage of total T cells that have proliferated, accumulation of proliferating T cells, or something else. Moreover, with in vitro suppression assays it is usually good practice to provide a dose curve with decreasing ratios of the suppressive cell population to account for culture related issues and other variables.

(9) Only evaluating CD69 expression by tumor-infiltrating T cells is not sufficient to report an effect of VTA activation on in vivo anti-tumor T cell responses. CD69 does not really indicate much in terms of anti-tumor effector T cell function as it can be up regulated by antigen exposure or type I IFNs. To corroborate that VTA activation attenuates the immunosuppressive activities of MDSCs on in vivo anti-tumor T cell responses, the authors should evaluate T cell-mediated cytokine production and/or cytolytic function.

(10) The results presented in Figure 4 are very compelling. However, these findings also raise a number of important questions about MDSC plasticity and longevity. For instance, it is unclear if the MDSCs are completely reprogrammed by the VTA activation and are no longer able to revert back to a pro-tumor phenotype. To have such a profound effect over 14 days would suggest that MDSCs survive a long period of time in vivo and do not turnover. How long do the adoptively transferred MDSCs survive in vivo? It is unclear if long-term survival of MDSCs is required for their effect or if only a short period of time is needed for them to influence the anti-tumor T cell response. It could also be that they are transferring over more neutrophils in the VTA-activated group (see above comment # 6). Or conversely, it could be that VTA-activated MDSCs do not survive as well following adoptive transfer. Understanding what contributes to this effect would be valuable to know in order to better appreciate what biologically underlies these results. Moreover, it would also be important to know whether these differences in tumor load are associated with altered anti-tumor T cell responses or if this occurs independently.

Minor comments

(1) It is unclear how NA levels were measured in Figure 2? qRT-PCR?

## **Reviewer #2 (Remarks to the Author):**

In this manuscript, Ben-Shaan et al expand on their interesting observation (published in Nat. Med) that activation of the reward system can lead to the stimulation of systemic immunity. Here, they demonstrate that DREADD expression in VTA can abrogate the growth of two subcutaneous tumor models (LLC lung cancer and B16 melanoma). Finding reported here are interesting and consistent with their previous observations. However, several issues have to be addressed before the manuscript is accepted for publication.

The exact mechanism by which VTA activation inhibited tumor growth still remains unclear.

Although, they suggest modulation of the bone marrow MDSCs by sympathetic nervous system (SNS) to be important, other potential mechanisms (such as activation of other innate immune cells such as NK cells) have not been explored. Furthermore, other microenvironmental changes (such as angiogenesis) were not examined. Additional mechanistic studies (highlighted below) would have strengthened this paper.z

Fig. 1: Durability of VTA activation (as measured by c-Fos expression) is only presented at 14 days post tumor implantation. Because some experiments extended to 21 and 28 days (Fig. 1g and 1h), persistence of VTA activation should be confirmed in these groups as well. Additionally, have they tested the impact of DREADD expression in other CNS locations besides VTA? Could their observations be due to generalized CNS DREADD expression or is it unique to VTA.

Fig. 2: Tumors in 6OHDA-treated mice (irrespective of VTA activation) appear to be twice as large as the untreated mice (Fig. 2b vs. 1f). Could 6OHDA directly stimulate tumor growth? If so, does this occur through inhibition of the SNS? Or, does 6OHDA have a direct impact on immune cells that express NA receptors? How about angiogenesis?

Fig. 3: TNF $\alpha$  expression was significantly increased in the spleen of VTA-activated mice (Fig. 3h) yet NA levels were not changed (Fig. 1e). This observation appears to be inconsistent with the proposed mechanism of SNS inactivation of MDSCs? Have the authors examined the activity of NK cells (or other CD3 cells) in the spleen or in the tumors in their model? Characterization of MDSC activity also appears to be superficial. Additional techniques, such as flow (to examine the MDSC or TAM phenotype markers like Arg, IDO, etc) or RNA-seq (nanotstring) would have provided more comprehensive information about MDSC polarization in VTA-activated mice.

Fig. 4: Have the authors performed depletion studies (Gr1 Ab) to confirm the role of MDSCs in this model?

### **Reviewer #3 (Remarks to the Author):**

This is a very exciting set of experimental results regarding the CNS pathways that regulate the effects of peripheral neurobiology on tumor growth. The core model supported by these studies is that VTA activation suppresses peripheral SNS signaling (particularly in bone marrow) and thereby reduces the production of MDSCs that would otherwise subsequently inhibit cellular immune responses against cancer. The authors present a promising set of studies to support this hypothesis, but several additional highly feasible studies would be required to more definitively support it. Please consider the remarks below as encouraging suggestions to enhance the impact of this already promising work.

Abstract:

Needs to include a description of tumor model/s used as a read-out (i.e., LLC and B16).

Abstract lacked any allusion to studies blocking MDSCs in the VTA-activation model in order to fully establish causation. Mimicry of VTA-activation effects in naive animals by adoptive transfer of MDSCs from VTA-activated mice shows that MDSCs are sufficient to facilitate

tumor growth, but does not establish whether they are necessary. For that MDSC inhibition (e.g., by inhibiting myeloid cell growth differentiation in general, or MDSC differentiation in particular) is required.

Introduction:

First 5 refs listed are not particularly comprehensive, and some are controversial/discredited. Perhaps cite more comprehensive review articles (e.g., 2 from Paige Green and colleagues in Nature Reviews Cancer and/or Andrew Steptoe et al in Nat Clin Pract Onc)?

It is not accurate to claim that mechanisms of psychobiological effects on cancer remain “unknown”; quite a lot is now known about peripheral neural, cellular, and molecular mechanisms of such effects (see the 2 review articles referenced above in Nat Rev Cancer). More accurate would be to claim that little is known about the CNS mechanisms involved, where this paper makes a very significant contribution (but see also Cao et al, Cell. 2010 Jul 9;142(1):52-64)

Need to clarify the nature of LLC cells when initially referenced in the text (what kind of cells are these, and how was their identity verified), along with the locale of sc injection.

6OHDA is not a clean abrogation of SNS (it induces massive catecholamine release prior to nerve fiber death). Results would be more persuasive if data show that pharmacologic abrogation of beta-adrenergic signaling (preferably with an agent that does not cross BBB, e.g., nadolol) also blocks effects of VTA activation on tumor growth.

The experiment in Fig 2 (6OHDA) lacks a positive control. Needs to be repeated in parallel with a sham SNS intervention (e.g., saline) that continues to show VTA activation of tumor growth in the same experiment as it is abrogated by 6OHDA (i.e., a 2 x 2 design instead of the current 2 condition experiment that attempts to compare with other separate experiments).

“Stress responses” can occur in the bone marrow, so it is inaccurate to equate stress with plasma catecholamine levels (as the ms appears to do now). More accurate to simply state no VTA activation-induced difference observed in plasma but significant difference observed in bone marrow.

SNS directly innervates some tumors, but certainly not all. Unless authors directly document SNS innervation of all/most tumors in the particular model examined here (e.g., by histological detection of nerve fibers in tumor tissue as in Fig 2h for bone marrow), it would be more accurate to say SNS innervates some tumors, or that SNS can innervate tumors, or something similarly less general. The intratumoral catecholamines assessed here may come predominately from blood or perivascular nerve fibers rather than from true innervation of the tumor parenchyma per se.

The results in Fig 3 are interpreted as showing that VTA activation suppresses SNS output

to the bone marrow and thereby inhibits the suppressive effect of MDSCs on T cell-mediated responses against cancer. However, the final step is not directly tested. One simple way to do that would be to conduct the VTA activation protocol in SCID or nude mice that lack functional T cells (in parallel with their parental strains bearing functional T cells).

Upregulated TNF production is implied to mediate VTA/SNS effects on T cell proliferation/activation, but that too is not directly demonstrated. Experiments with TNF knockout mice or anti-TNF neutralizing antibody would support that claim.

According to the experimental schematic in Fig 4, adoptive transfer of PMN-MDSCs into naïve mice is sufficient to mimic effects observed in Fig 1. Several questions arise, including whether similar effects occur with adoptive transfer M-MDSCs?, whether comprehensive numerical measures of tumor size are also affected (e.g., as in Fig 1e)?, and whether inhibition of MDSCs in the VTA-activated mice blocks effects on tumor growth in those animals.

Much is known about how SNS activation in bone marrow enhances myeloid differentiation (e.g., from studies by P Frenette et al., J Sheridan's group and particularly a study by Powell et al, and the group of Nahrendorf & Swirski). That material should be cited and could help design experiments identifying the molecular mechanism by which VTA-induced SNS downregulation inhibits MDSC development/distribution. One approach might involve analysis of the myeloid growth factors already demonstrated to be upregulated by beta-adrenergic signaling (e.g., as in Sheridan's and Frenette's studies).

The Discussion needs to acknowledge some limitations on the scope of conclusions that can be drawn from these studies. E.g., LLC and B16 are poor models of tumor initiation or metastasis; they assess predominately primary tumor growth rates in already-established cancer cells. There is no verification of relevance to human cancer, or to tumor growth in orthotopic tissue settings. Tumor injections into blood sc are not broadly representative of normal conditions where tumors initiate in solid tissues. The number of cell lines examined is limited, and the present models may overestimate the breadth of effects on other tumor types that are not highly immunogenic or lung localized. All that said, the authors are to be complimented for their careful interpretation of these studies as a test of basic physiological relationships among the nervous, immune, and tumor systems, as opposed to claiming a mechanism for the controversial clinical relationships between positive mood and cancer progression.

1 May 8, 2018

2

3

4 We would like to thank the referees for their time and attention in reviewing our manuscript entitled "Modulation  
5 of anti-tumor immunity by the brain's reward system".

6 In this manuscript, we provided the first demonstration that reward system activity can alter the anti-tumor  
7 immune response. Thanks to the reviewers' comments, we clarified the manuscript and performed several  
8 additional key experiments that substantiated our findings and expanded our understanding of the mechanisms  
9 underlying this effect. Below is a summary of these main new experiments:

10 1. To demonstrate the involvement of the sympathetic nervous system in mediating reward system effects, we  
11 originally used 6OHDA. We now added another experiment using the  $\beta$ -adrenergic blocker, Nadolol (Fig 2b).  
12 This manipulation, similarly to the effect of 6OHDA, eliminated the beneficial effects of the reward system on  
13 tumor growth.

14 2. We originally applied an adoptive transfer experiment to demonstrate that MDSCs were sufficient to mediate  
15 the VTA-induced attenuation in tumor growth. We now added an experiment using anti-Gr-1 antibody to deplete  
16 MDSCs in VTA activated mice, demonstrating that MDSCs are also necessary for the beneficial effect of VTA on  
17 tumor growth (Fig 4b).

18 3. Originally, we demonstrated that MDSCs transferred to recipient mice were sufficient to attenuate tumor  
19 growth, but we did not verify that these cells survive within the recipient mice. To address this point, we repeated  
20 this transfer experiment using GFP mice as recipients. We analyzed the recipients at three different time points  
21 (Fig S14) following transplantation, and we now show that the MDSCs survive in the recipient mice.

22 4. We provide new evidence that in the VTA-activated mice, CD8 T cells demonstrated elevated levels of  
23 Granzyme B (Fig 4a). Moreover, this effect appears to depend on MDSCs, because depletion of MDSCs  
24 eliminated the effect of VTA activation on Granzyme B levels.

25 In addition, as detailed in the point by point response, we address all the specific concerns raised by the  
26 reviewers.

27

28 Reviewers' comments:

29

30 Reviewer #1 (Remarks to the Author):

31 ***This work by Ben-Shaanan and Schiller et al. follows up on their recently published Nature Medicine***  
32 ***paper in which they reported that VTA activation can alter peripheral immune responses and contribute***  
33 ***to improved pathogen control. For this study, they wanted to address whether VTA activation similarly***  
34 ***promotes enhanced anti-tumor immune responses. They report here that VTA activation does indeed***  
35 ***lead to improved tumor control and that this is mediated at least in part through modulation of CD11b+Gr-***  
36 ***1+ cell activity. They also employ pharmacological approaches to support a role for the sympathetic***  
37 ***nervous system (SNS) and noradrenergic input in VTA activation associated boosting of anti-tumor***  
38 ***immune responses. This area of research is compelling and timely and the Rolls lab is uniquely***  
39 ***positioned to execute these studies. However, there are several key issues, which I believe need to be***  
40 ***addressed in order to solidify their central findings and conclusions.***

41

42 We would like to thank the reviewer for the evaluation of the work and the helpful suggestions.

43 ***Major comments: Please note that we merged points 1 and 10 as they both relate to the transfer***  
44 ***experiment.***

45  
46 **(1) It would be helpful in the evaluation of their findings to know whether VTA activation influences the**  
47 **efficiency of cellular adoptive transfer. For instance, does their treatment conditions promote a more**  
48 **robust peritoneal immune response that results in an initial rejection of tumor cells and/or MDSCs**  
49 **immediately following injection?**

50 **(10) The results presented in Figure 4 are very compelling. However, these findings also raise a number**  
51 **of important questions about MDSC plasticity and longevity. For instance, it is unclear if the MDSCs are**  
52 **completely reprogrammed by the VTA activation and are no longer able to revert back to a pro-tumor**  
53 **phenotype. To have such a profound effect over 14 days would suggest that MDSCs survive a long period**  
54 **of time in vivo and do not turnover. How long do the adoptively transferred MDSCs survive in vivo? It is**  
55 **unclear if long-term survival of MDSCs is required for their effect or if only a short period of time is**  
56 **needed for them to influence the anti-tumor T cell response. It could also be that they are transferring**  
57 **over more neutrophils in the VTA-activated group (see above comment # 6). Or conversely, it could be**  
58 **that VTA-activated MDSCs do not survive as well following adoptive transfer. Understanding what**  
59 **contributes to this effect would be valuable to know in order to better**  
60 **appreciate what biologically underlies these results. Moreover, it would also be important to know**  
61 **whether these differences in tumor load are associated with altered anti-tumor T cell responses or if this**  
62 **occurs independently.**

63 The reviewer raises several important questions regarding the nature of the adoptive transfer. Below we have  
64 summarized and answered these concerns.

65 1) Can the reduction in tumor size be explained by initial elimination of the tumor cells?

66 The transfer experiment was originally designed to determine whether the effect of VTA activation on MDSCs is  
67 sufficient to account for the reduction in tumor weight. To this end, we injected MDSCs along with an equal  
68 number of tumor cells, and evaluated the effects on tumor size 14 days following the transfer. To determine  
69 whether the effect occurs immediately after transplantation (e.g. initial rejection of the tumor cells) or if it requires  
70 time to develop, we now added another experiment, designed to evaluate the effect on tumor growth at an earlier  
71 time point, 7 days after the transfer. Our findings suggest that there wasn't an initial rejection of the tumor cells  
72 in the VTA-activated group, as there was no difference in the tumor weight at this time point (Fig S15;  $p < 0.2417$ ).

73 2) Do transferred MDSCs survive in the recipient mice?

74 We determined whether and for how long the transferred MDSCs can survive in the tumor environment of the  
75 recipient mice. We transferred MDSCs along with tumor cells, into GFP mice. The expression of GFP by the  
76 recipient mice allowed us to distinguish between the transferred and resident MDSCs populations. We analyzed  
77 the survival rate of the transferred MDSCs at three different time points following transplantation: 4, 7 and 14  
78 days. As shown in Figure S14, transplanted MDSCs represented  $37.1 \pm 2.7\%$  of total MDSCs 4 days after  
79 transplantation,  $28.9 \pm 3.8\%$  at 7 days, and  $9.1 \pm 1.9\%$  at 14 days. Thus, we demonstrate that MDSCs survive in  
80 the tumor microenvironment, though their abundance is reduced over time.

81 3) Are the effects on T cells MDSCs-dependent, or do they occur independently?

82 We extended our characterization of the effector T cell functions and demonstrated that CD8 T cells in VTA  
83 activated mice, manifest an increase in Granzyme B expression. We further show that this increase is MDSCs-  
84 dependent, as MDSCs depletion (using systemic injection of anti Gr-1 antibody), eliminated this difference in  
85 Granzyme B levels by CD8 T cells (Fig 4a).

86 4) The reviewer correctly indicates that there is no reliable tool to differentiate between neutrophils and PMN-  
87 MDSCs (also referred as granulocytic MDSCs). We now emphasize this point in the text (pages 4,6). However,  
88 to address this issue, at least in part, we now provide evidence that VTA activation did not affect the relative  
89 abundance of M-MDSCs and PMN-MDSCs (Fig. S7).

90

91 **(2) Control images and quantification are needed to validate equal neuronal infection between control**  
92 **and VTA virus injections in Figure 1B-C and Supplementary Figures 1-2.**

93 We now calibrated the percentage of cells infected with the DREADD-encoding virus versus infection with the  
94 control virus. As shown in Fig. S1, there was no significant difference in the percentage of infected cells ( $p < 0.26$ ).

95  
96 **(3) Control groups should be more extensively described in all of the figure legends. For instance, are**  
97 **the control groups AAV8-hSyn-DIO-mCherry infection plus CNO treatment? Or just one or the other?**  
98 **This should be stated in each of the figure legends.**

99 Thank you for highlighting this omission. We added full descriptions of the control groups in all figure legends.

100

101 **(4) Confirmation is needed to validate that DREADD-induced activation of cells in the VTA is specifically**  
102 **responsible for orchestrating the observed changes in anti-tumor immune responses. It could be that**  
103 **TH+ cells in other regions of the brain are also infected. To demonstrate that the reported effects are due**  
104 **to DREADD-mediated activation only in the VTA, the authors should additionally evaluate mCherry**  
105 **staining in other brain regions that have also been proposed to wire the brain's reward system, including**  
106 **the nucleus accumbens, lateral hypothalamus frontal cortex, etc.**

107 As suggested by the reviewer, we now provide representative immunofluorescence images of the nucleus  
108 accumbens, lateral hypothalamus, and frontal cortex from the brains of mice injected with a virus (Fig. S2). There  
109 was no mCherry expression in these brain regions, demonstrating that DREADD expression was restricted to  
110 the VTA.

111  
112 **(5) Utilization of 6OHDA to ablate the SNS could potentially have off-target effects that may influence the**  
113 **interpretation of their data. Therefore, a secondary approach to ablate SNS function would help to**  
114 **strengthen their conclusion that the SNS is mechanistically involved in mediating the effects of VTA**  
115 **activation on tumor eradication. Furthermore, the authors should also confirm that 6OHDA does not**  
116 **cross the BBB in their model. They cite that 6OHDA does not normally cross the BBB under homeostatic**  
117 **conditions. However, they are now introducing a number of variables into their system including tumor-**  
118 **induced inflammation and CNO treatment, both of which could potentially influence the integrity of the**  
119 **BBB separately or in tandem.**

120 This is an important question. Therefore, as a complementary approach, we used Nadolol, a  $\beta$ -adrenergic  
121 antagonist that does not cross the BBB, an approach suggested by Reviewer #3 to consolidate the involvement  
122 of the SNS in mediating the beneficial effects of VTA activation on tumor weight. In analogy to the effect of  
123 6OHDA, Nadolol treatment eliminated the effects of VTA activation on tumor growth (Fig. 2b). These findings  
124 further support the mechanistic involvement of the sympathetic nervous system in VTA-induced tumor  
125 suppression.

126 Moreover, to confirm that catecholaminergic neurons in the brain were not affected by the 6OHDA treatment, we  
127 demonstrate that there was no significant difference in the number of TH<sup>+</sup> cells in the VTA of tumor bearing mice  
128 following 6OHDA or vehicle injection (Fig. S4).

129  
130 **(6) The authors rely on Gr-1+CD11b+ staining to identify MDSCs in their studies. The possibility exists**  
131 **that some of their differences that they ascribe to MDSCs in VTA-activated vs. control mice are actually**  
132 **due to the effects of VTA stimulation on neutrophil responses. Gr-1 stains both Ly6C and Ly6G, thus**  
133 **their gating strategy could include both neutrophils (CD11b+Ly6G+) and MDSCs (CD11b+Ly6C/G+).**

134 As the reviewer correctly indicates, based on the literature and in agreement with our gating strategy,  
135 CD11b+Ly6G+ cells may be comprised of both granulocytic MDSCs and neutrophils. Because there is no clear  
136 way to distinguish between these populations, we refer to these cells collectively as PMN-MDSCs (Neutrophils  
137 and polymorphonuclear myeloid-derived suppressor cells). We now discuss this point in the manuscript on pages



138 4 and 6. In addition, in Figure S7, we demonstrate that there was no difference between the VTA-activated mice  
139 and controls in the relative abundance of PMN-MDSCs identified by their expression of CD11b and Ly6G versus  
140 M-MDSCs identified by their expression of CD11b and Ly6C.

141  
142 **(7) The induction of p-CREB MFI levels following beta-agonist treatment is not all that striking.**  
143 **Representative histogram plots should be provided to accompany the MFI data plotted in Figure 3C to**  
144 **properly evaluate these differences.**

145 As suggested by the reviewer, we added a representative histogram showing the change in p-CREB levels  
146 following  $\beta$ -agonist treatment (Fig S6). Moreover, we agree with the reviewer's comment that changes in p-CREB  
147 MFI are not striking. One factor that can explain this phenomenon, is that the cells used for the analysis were  
148 isolated from the bone marrow, a niche with relatively high NA levels (Fig S5). To substantiate this claim, we provide  
149 a reviewer figure, demonstrating a representative staining of bone marrow MDSCs isolated from tumor bearing mice  
150 treated with a  $\beta$ -adrenergic antagonist (Nadolol). Indeed, in Ly6G<sup>+</sup> and Ly6C<sup>+</sup> bone marrow cells of Nadolol treated  
151 mice, p-CREB staining was lower than vehicle treated mice, corroborating the capacity of p-CREB staining as a  
152 reporter of  $\beta$ -adrenergic activity.  
153  
154  
155  
156

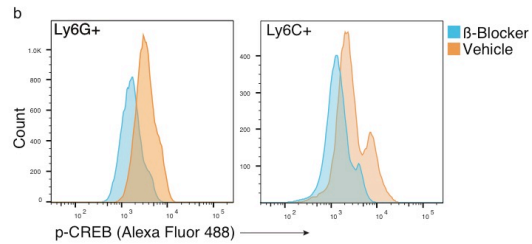

157  
158 **(8) The technical aspects of their MDSC: T cell suppression experiments are not adequately described in**  
159 **the methods, figure legend, or actual text. It is unclear if they are measuring percentage of total T cells**  
160 **that have proliferated, accumulation of proliferating T cells, or something else. Moreover, with in vitro**  
161 **suppression assays it is usually good practice to provide a dose curve with decreasing ratios of the**  
162 **suppressive cell population to account for culture related issues and other variables.**

163 We have now expanded the description of the experiment in Figure legend 3i, 3k and in the Methods (page 25).  
164 As advised by the reviewer, we now provide the relevant controls in Fig S11, including: activated and non-  
165 activated CFSE labelled CD4 T cells cultured without MDSCs, as well as CD4 T cells cultured with MDSCs from  
166 VTA activated mice, and with MDSCs from sham-virus injected mice.

167 Regarding the use of a dose response: Although a dose curve was applied while calibrating the initial  
168 experimental protocol, due to the limited availability of the MDSCs from VTA activated mice and controls, we had  
169 to limit the experimental design to a single dose.

170  
171 **(9) Only evaluating CD69 expression by tumor-infiltrating T cells is not sufficient to report an effect of**  
172 **VTA activation on in vivo anti-tumor T cell responses. CD69 does not really indicate much in terms of**  
173 **anti-tumor effector T cell function as it can be up regulated by antigen exposure or type I IFNs. To**  
174 **corroborate that VTA activation attenuates the immunosuppressive activities of MDSCs on in vivo anti-**  
175 **tumor T cell responses, the authors should evaluate T cell-mediated cytokine production and/or cytolytic**  
176 **function.**

177 The reviewer correctly states that changes in CD69 expression do not necessarily represent a functional change  
178 in an effector cell. To directly address the reviewer's comment, we further characterized tumor and spleen CD4  
179 and CD8 T cell abundance, IFN- $\gamma$  and TNF- $\alpha$  expression, as well as Granzyme B expression by tumor CD8 T  
180 cells. We did not observe any difference in the abundance of the T cells or their TNF- $\alpha$ /IFN- $\gamma$  levels (Fig S12).  
181 However, we did find an increase in Granzyme B levels in tumor-associated CD8 T cells of VTA-activated mice  
182 compared to controls ( $p < 0.0159$ ; Fig 4a, Fig S13). This further supports our findings that VTA activations induces  
183 anti-tumor immune response.

184  
185 **Minor comments**

186  
187 **(1) It is unclear how NA levels were measured in Figure 2? qRT-PCR?**

188 Levels of NA were measured by ELISA and validated by immunohistochemistry. We now clarify this point in the  
189 legend of Figure 2.

190  
191  
192  
193 **Reviewer #2 (Remarks to the Author):**

194  
195 *In this manuscript, Ben-Shaanan et al expand on their interesting observation (published in Nat. Med)*  
196 *that activation of the reward system can lead to the stimulation of systemic immunity. Here, they*  
197 *demonstrate that DREADD expression in VTA can abrogate the growth of two subcutaneous tumor*  
198 *models (LLC lung cancer and B16 melanoma). Finding reported here are interesting and consistent with*  
199 *their previous observations. However, several issues have to be addressed before the manuscript is*  
200 *accepted for publication. The exact mechanism by which VTA activation inhibited tumor growth still*  
201 *remains unclear. Although, they suggest modulation of the bone marrow MDSCs by sympathetic nervous*  
202 *system (SNS) to be important, other potential mechanisms (such as activation of other innate immune*  
203 *cells such as NK cells) have not been explored. Furthermore, other microenvironmental changes (such*  
204 *as angiogenesis) were not examined. Additional mechanistic studies (highlighted below) would have*  
205 *strengthen this paper.*

206 We would like to thank the reviewer for the helpful comments and suggestions.

207  
208 **1. Fig. 1: Durability of VTA activation (as measured by c-Fos expression) is only presented at 14 days**  
209 **post tumor implantation. Because some experiments extended to 21 and 28 days (Fig. 1g and 1h),**  
210 **persistence of VTA activation should be confirmed in these groups as well. Additionally, have they**  
211 **tested the impact of DREADD expression in other CNS locations besides VTA? Could their**  
212 **observations be due to generalized CNS DREADD expression or is it unique to VTA.**

213 To address the reviewer's comment, we now provide c-Fos calibration on day 28. Our results demonstrate that  
214 DREADD manipulation was also effective at this time point (Fig S3;  $p < 0.012$ ).

215 The reviewer also correctly suggests that activity of other brain regions may also affect tumor growth. In fact, a  
216 major focus of my lab is to characterize the peripheral immune changes induced by activity of different brain  
217 regions, as they serve different roles in an organism's behavior and physiology. However, as each of these brain  
218 areas requires extensive characterization, we consider such a survey to be beyond the scope of the current  
219 study.

220 A third point raised by the reviewer is that the observed effects could be due to generalized CNS DREADD  
221 expression. To address this comment, we provide in Figure S2, an immunohistochemical analysis of mCherry  
222 labeling (a marker of DREADD expression in our system) to demonstrate that there is no neuronal expression of  
223 mCherry beyond the VTA dopaminergic neurons.

224  
225 **2. Fig. 2: Tumors in 6OHDA-treated mice (irrespective of VTA activation) appear to be twice as large as**  
226 **the untreated mice (Fig. 2b vs. 1f). Could 6OHDA directly stimulate tumor growth? If so, does this occur**  
227 **through inhibition of the SNS? Or, does 6OHDA have a direct impact on immune cells that express NA**  
228 **receptors? How about angiogenesis?**

229 As the reviewer correctly points out, the tumors in the 6OHDA-treated mice are larger than in un-treated controls.  
230 This is in line with the literature indicating that sympathetic activity plays a role in tumor growth (e.g. L. Horvathova  
231 et al, 2016 and SW. Cole et al, 2015). In this study, we used 6OHDA to eliminate peripheral sympathetic activity  
232 in order to determine whether the SNS is required to mediate the signal between the brain's reward system to  
233 the periphery. We found that in the absence of an active SNS, the VTA had no effect on tumor growth. In the

234 revised version, we took an additional approach to validate SNS involvement in mediating the effects of the VTA,  
235 which was suggested by Reviewer #3. Instead of 6OHDA, we treated VTA activated mice and their controls with  
236 Nadolol, a  $\beta$ -adrenergic blocker. Similar to the effect of 6OHDA, we found that Nadolol treatment abrogated VTA  
237 effects on tumor growth (Fig 2b), further demonstrating SNS involvement in VTA-induced reduction in tumor  
238 weight.

239 Regarding the potential effects of VTA activation on angiogenesis, we could not find any differences in MDSCs  
240 RNA expression of VEGF following exposure to a  $\beta$ -adrenergic agonist or from VTA-activated mice and their  
241 controls (Fig S8, S9). Similarly, there was no significant difference in mRNA levels of CD31 in total tumor tissue  
242 following VTA activation (Fig S10).

243  
244 **3. Fig. 3: TNF $\alpha$  expression was significantly increased in the spleen of VTA-activated mice (Fig. 3h) yet**  
245 **NA levels were not changed (Fig. 1e). This observation appears to be inconsistent with the proposed**  
246 **mechanism of SNS inactivation of MDSCs? Have the authors examined the activity of NK cells (or other**  
247 **CD3 cells) in the spleen or in the tumors in their model?**

248 Indeed, as noted by the reviewer, NA levels were not affected in the spleen, tumor, or plasma (Fig 2d-f). However,  
249 in the bone marrow, the production site of MDSCs, NA levels were reduced in the VTA-activated mice (Fig 2g-i).  
250 Thus, this change in the milieu where the MDSCs develop, may affect their subsequent functional profile. We  
251 now discuss this point on page 5.

252 Addressing the reviewer's suggestion that we characterize additional CD3 cell populations, we found that CD8  
253 cells from VTA-activated mice expressed elevated Granzyme B levels (Fig 4a, Fig S13), which is consistent with  
254 the reduction in tumor size. Thus, we did not expand our analysis to NK, although, based on an initial screen we  
255 performed, we did not observe any effect on their expression of Granzyme B (tumor  $p < 0.1425$ , spleen  $p < 0.6051$ ),  
256 IFN- $\gamma$  (tumor  $p < 0.2514$ , spleen  $p < 0.6873$ ) or CD27 (tumor  $p < 0.6044$ ,  $p < 0.8120$ ).

257  
258 **4. Characterization of MDSC activity also appears to be superficial. Additional techniques, such as flow**  
259 **(to examine the MDSC or TAM phenotype markers like Arg, IDO, etc) or RNA-seq (nanosttring) would have**  
260 **provided more comprehensive information about MDSC polarization in VTA-activated mice.**

261 We now extended our analysis of tumor MDSCs from VTA activated mice and their controls, to include flow  
262 analysis of IDO, Arginase, PD-1, IFN $\gamma$  and iNOS. None of these markers was altered by VTA activation, as shown  
263 in Figure S9.

264  
265 **5. Fig. 4: Have the authors performed depletion studies (Gr1 Ab) to confirm the role of MDSCs in this**  
266 **model?**

267 We would like to thank the reviewer for this important suggestion. We added a demonstration that Gr-1-mediated  
268 depletion abrogated the VTA-induced effects on tumor growth (Fig 4b). Thus, we now show that MDSCs are both  
269 necessary and sufficient to mediate VTA-induced effects on tumor growth.

270

271

272 **Reviewer #3 (Remarks to the Author):**

273

274

275 ***This is a very exciting set of experimental results regarding the CNS pathways that regulate the effects***  
276 ***of peripheral neurobiology on tumor growth. The core model supported by these studies is that VTA***  
277 ***activation suppresses peripheral SNS signaling (particularly in bone marrow) and thereby reduces the***  
278 ***production of MDSCs that would otherwise subsequently inhibit cellular immune responses against***  
279 ***cancer. The authors present a promising set of studies to support this hypothesis, but several additional***

280 **highly feasible studies would be required to more definitively support it. Please consider the remarks**  
281 **below as encouraging suggestions to enhance the impact of this already promising work.**

282

283 We would like to thank the reviewer for the careful evaluation of the study and the helpful comments.

284

285 **1. Abstract needs to include a description of tumor model/s used as a read-out (i.e., LLC and B16).**

286

287 We added a description of the relevant cancer models to the abstract.

288

289 **2. Abstract lacked any allusion to studies blocking MDSCs in the VTA-activation model in order to fully**  
290 **establish causation. Mimicry of VTA-activation effects in naive animals by adoptive transfer of MDSCs**  
291 **from VTA-activated mice shows that MDSCs are sufficient to facilitate tumor growth, but does not**  
292 **establish whether they are necessary. For that MDSC inhibition (e.g., by inhibiting myeloid cell growth**  
293 **differentiation in general, or MDSC differentiation in particular) is required.**

294

295 The reviewer is correct; in the original version of our manuscript, we only demonstrated that MDSCs are sufficient  
296 to mediate the effects of VTA-activation tumor weight via the transfer experiment. To also establish the  
297 requirement for these cells, we performed Gr-1 depletion. In this experiment, we injected VTA-activated mice  
298 and their controls with anti Gr-1 antibody, in order to deplete MDSCs. We now show in Fig 4b that MDSCs  
299 depletion abrogates the effects of VTA on tumor growth. Thus, MDSCs are both sufficient and necessary to  
300 mediate VTA-effects on the tumor.

301

302 **3. Introduction: First 5 refs listed are not particularly comprehensive, and some are**  
303 **controversial/discredited. Perhaps cite more comprehensive review articles (e.g., 2 from Paige Green**  
304 **and colleagues in Nature Reviews Cancer and/or Andrew Steptoe et al in Nat Clin Pract Onc)?**

305 Thank you for pointing out these issues with the papers that we cited. We now replaced the papers that we  
306 initially referenced, with those suggested by the reviewer.

307

308 **4. It is not accurate to claim that mechanisms of psychobiological effects on cancer remain “unknown”;**  
309 **quite a lot is now known about peripheral neural, cellular, and molecular mechanisms of such effects**  
310 **(see the 2 review articles referenced above in Nat Rev Cancer). More accurate would be to claim that little**  
311 **is known about the CNS mechanisms involved, where this paper makes a very significant contribution**  
312 **(but see also Cao et al, Cell. 2010 Jul 9;142(1):52-64)**

313

314 We modified the text to read: “However, these studies have yielded inconsistent result, and our understanding of  
315 the central neuronal mechanisms underlying the effect of emotional states on cancer is still limited.” (page 2).

316

317 **5. Need to clarify the nature of LLC cells when initially referenced in the text (what kind of cells are these,**  
318 **and how was their identity verified), along with the locale of sc injection.**

319 This was added to the text as part of a more comprehensive description of the tumor model, both in the main text  
320 (page 2) and in the Methods (page 20).

321

322 **6. 6OHDA is not a clean abrogation of SNS (it induces massive catecholamine release prior to nerve fiber**  
323 **death). Results would be more persuasive if data show that pharmacologic abrogation of beta-adrenergic**

324 **signaling (preferably with an agent that does not cross BBB, e.g., nadolol) also blocks effects of VTA**  
325 **activation on tumor growth.**

326 We would like to thank the reviewer for the suggestion to use Nadolol. Using this agent, we were able to  
327 demonstrate that VTA activation indeed requires sympathetic activity, specifically,  $\beta$ -adrenergic signaling (Fig  
328 2b).

329  
330 **7. The experiment in Fig 2 (6OHDA) lacks a positive control. Needs to be repeated in parallel with a sham**  
331 **SNS intervention (e.g., saline) that continues to show VTA activation of tumor growth in the same**  
332 **experiment as it is abrogated by 6OHDA (i.e., a 2 x 2 design instead of the current 2 condition experiment**  
333 **that attempts to compare with other separate experiments).**

334 This is absolutely correct and we now added the relevant experimental conditions to the revised Fig 2a.

335  
336 **8. “Stress responses” can occur in the bone marrow, so it is inaccurate to equate stress with plasma**  
337 **catecholamine levels (as the ms appears to do now). More accurate to simply state no VTA activation-**  
338 **induced difference observed in plasma but significant difference observed in bone marrow.**

339 We corrected the text (page 3).

340  
341 **9. SNS directly innervates some tumors, but certainly not all. Unless authors directly document SNS**  
342 **innervation of all/most tumors in the particular model examined here (e.g., by histological detection of**  
343 **nerve fibers in tumor tissue as in Fig 2h for bone marrow), it would be more accurate to say SNS**  
344 **innervates some tumors, or that SNS can innervate tumors, or something similarly less general. The**  
345 **intratumoral catecholamines assessed here may come predominately from blood or perivascular nerve**  
346 **fibers rather than from true innervation of the tumor parenchyma per se.**

347 We modified the text to state: “However, the SNS also directly innervates organs relevant to cancer biology,  
348 including some tumors and all immune organs”. (Page 4)

349  
350 **10. The results in Fig 3 are interpreted as showing that VTA activation suppresses SNS output to the**  
351 **bone marrow and thereby inhibits the suppressive effect of MDSCs on T cell-mediated responses against**  
352 **cancer. However, the final step is not directly tested. One simple way to do that would be to conduct the**  
353 **VTA activation protocol in SCID or nude mice that lack functional T cells (in parallel with their parental**  
354 **strains bearing functional T cells). Upregulated TNF production is implied to mediate VTA/SNS effects**  
355 **on T cell proliferation/activation, but that too is not directly demonstrated. Experiments with TNF**  
356 **knockout mice or anti-TNF neutralizing antibody would support that claim.**

357 The reviewer is absolutely correct that while we established a causal connection between VTA activation and  
358 MDSCs, we did not demonstrate the connection between MDSCs and T cells, or MDSCs-produced TNF- $\alpha$  and  
359 T cell function. Although it will be compelling to perform VTA-activation in T cell deficient mice, our ability to target  
360 the VTA dopaminergic neurons depends on the use of a transgenic mouse strain (TH-Cre). Thus, we cannot  
361 perform this experiment within a reasonable time frame. Similarly, the use of TNF-KO mice would allow us to  
362 establish the connection between MDSCs-produced TNF- $\alpha$  and the effect on T cells; however, generating TH-  
363 Cre+ - TNF-KO mice will require an extensive breeding program. Moreover, TNF- $\alpha$  is produced by various cell  
364 populations (immune and others), and it will thus be difficult to isolate the MDSCs-dependent effect.

365 Although we could not perform the suggested experiments, we wanted to further establish the connection  
366 between MDSCs and T cell-mediated responses following VTA activation. We found that following VTA  
367 activation, tumor CD8 T cells increase their Granzyme B expression, and this increase is indeed MDSCs-  
368 dependent. We show in Fig 4a that MDSCs depletion (using systemic injection of anti Gr-1 antibody), eliminated  
369 this difference in Granzyme B levels in CD8 T cells. Nevertheless, our findings do not rule out the possibility that  
370 other processes which are MDSCs independent are also involved. We now discuss this point on page 6.

371

372 **11. According to the experimental schematic in Fig 4, adoptive transfer of PMN-MDSCs into naïve mice**  
373 **is sufficient to mimic effects observed in Fig 1. Several questions arise, including whether similar effects**  
374 **occur with adoptive transfer M-MDSCs?, whether comprehensive numerical measures of tumor size are**  
375 **also affected (e.g., as in Fig 1e)?, and whether inhibition of MDSCs in the VTA-activated mice blocks**  
376 **effects on tumor growth in those animals.**

377 We would like to thank the reviewer for pointing out we did not clarify in the original manuscript that we used both  
378 M-MDSCs and PMN-MDSCs. We used unfractionated MDSCs in our transfer experiments, mostly for technical  
379 reasons. It is extremely difficult to purify a sufficient number of M-MDSCs to achieve effective transfer. Therefore,  
380 for the transfer experiment, we isolated the MDSCs based on their expression of Gr-1 and CD11b. We now clarify  
381 this issue on page 6. Nevertheless, we could partially address the question of MDSC subtypes, by demonstrating  
382 that VTA-activation did not alter the relative proportion of PMN-MDSCs and M-MDSCs used for the transfer (Fig.  
383 S7).

384 The additional numerical measurement of the tumor size, which were suggested by the reviewer, are now  
385 provided in Fig. 4f.

386 Finally, to determine whether MDSCs inhibition in VTA-activated or control mice affected tumor growth, we  
387 performed the Gr-1-depletion experiment, showing that MDSCs are required to mediate the effect of VTA on  
388 tumor growth. It is now included as Fig. 4b.

389

390 **12. Much is known about how SNS activation in bone marrow enhances myeloid differentiation (e.g., from**  
391 **studies by P Frenette et al., J Sheridan's group and particularly a study by Powell et al, and the group of**  
392 **Nahrendorf & Swirski). That material should be cited and could help design experiments identifying the**  
393 **molecular mechanism by which VTA-induced SNS downregulation inhibits MDSC**  
394 **development/distribution. One approach might involve analysis of the myeloid growth factors already**  
395 **demonstrated to be upregulated by beta-adrenergic signaling (e.g., as in Sheridan's and Frenette's**  
396 **studies).**

397 The reviewer is correct that understanding the underlining molecular mechanism will be beneficial. However,  
398 following consultation with the Editor, we consider the specific molecular characterization will be beyond the  
399 scope of the present study. We discuss this limitation on page 7 and added the proposed citations.

400

401 **13. The Discussion needs to acknowledge some limitations on the scope of conclusions that can be**  
402 **drawn from these studies. E.g., LLC and B16 are poor models of tumor initiation or metastasis; they**  
403 **assess predominately primary tumor growth rates in already-established cancer cells. There is no**  
404 **verification of relevance to human cancer, or to tumor growth in orthotopic tissue settings. Tumor**  
405 **injections into blood sc are not broadly representative of normal conditions where tumors initiate in solid**  
406 **tissues. The number of cell lines examined is limited, and the present models may overestimate the**  
407 **breadth of effects on other tumor types that are not highly immunogenic or lung localized. All that said,**  
408 **the authors are to be complimented for their careful interpretation of these studies as a test of basic**  
409 **physiological relationships among the nervous, immune, and tumor systems, as opposed to claiming a**  
410 **mechanism for the controversial clinical relationships between positive mood and**  
411 **cancer progression.**

412 We agree with the reviewer that the present study serves mainly as an initial indication of the potential  
413 of brain activity, and specifically the reward system, to affect tumor growth. Accordingly, we now expanded the  
414 description of the relevant limitations of our results and modified the text to state: "It is important to note that we  
415 do not consider such robust and specific modulations of VTA activity (as induced here by DREADD activation)  
416 to be physiological and the relevance to human cancer is still unknown. Moreover, in this study, we used two  
417 tumor models that evaluate a specific aspect in tumor biology, namely, primary tumor growth rates. Thus, other  
418 aspects of cancer development and progression such as tumor initiation or metastasis remain unknown. Rather  
419 than dissecting the specific molecular mechanisms mediating these effects, our study aims to demonstrate a

420 functional connection between a mood-regulating neuronal circuit, such as the reward system, and tumor  
421 growth.”

422

423

**REVIEWERS' COMMENTS:**

**Reviewer #1 (Remarks to the Author):**

The authors did an outstanding job of addressing my concerns and I believe that the revised manuscript is now suitable for publication at Nature Communications. Congratulations on this excellent work.

**Reviewer #3 (Remarks to the Author):**

The authors have done an outstanding job of addressing all of the major issues highlighted in my previous review.
